# Supplementary material
Source: Springer Nature journal article supplement (https://www.springermedizin.de/resource/supplementary/12889_2013_5660_MOESM2_ESM.pdf/9495960)
Supplement: MOESM2 [file 9495960]

**Pre-existing mental model**

Vaccines protect 100% against infection

**Pre-existing mental model**

Prevention programs help to lower risk of HIV transmission

**Assumption 1**

*Overestimation of likely efficacy of candidate vaccine*

"Trialists would not be testing a vaccine if it were not very likely to be (100%) effective"

**Assumption 2**

*Overestimation of likelihood of being in the experimental group*

"I am very likely to get the candidate vaccine"

**Assumption 3**

*Vaccine trials are prevention programs*

"CBOs wouldn't refer me to the trial if it were not going to protect me from HIV infection"

**Intervention strategy**

Provide explicit information and education that *most* products tested in clinical trials *do not* work

**Intervention strategy**

Provide explicit information that trial volunteers have equal chances of getting the test vaccine or the placebo; thus condom use is necessary

**New mental model**

**Preventive Misconception**

"HIV vaccine trial volunteers gain protection against HIV infection"

**Intervention strategy**

Provide explicit information that clinical trials (controlled medical experiments) are *not* the same as interventions; participation may not offer individual benefits, but may benefit the community/society

**Inference based on new mental model**

**Behavioral Disinhibition**

"Trial volunteers don't need to use condoms as they are already protected"

**Assumption 5**

"It is natural for people not to adhere to a more demanding protective measure (e.g., condom use) when they feel protected by a relatively simpler measure (e.g., protection offered by the candidate vaccine)"

**Assumption 4**

"Trial volunteers should not use condoms as trialists then won't know if the test vaccine works or not"

**Intervention strategy**

Provide explicit information that volunteers in a trial should use condoms; and that one is not asked to change one's behavior to "help" the trial

**Intervention strategy**

Ongoing counselling and testing with reminders that the trial vaccine is merely experimental and that one must continue to use condoms
